# Supplementary material for: Aberrant expression of S-SCAM causes the loss of GABAergic synapses in hippocampal neurons
Source: PubMed Central journal article supplement (PMC6952429; doi:10.1038/s41598-019-57053-y), 2020-01-09
Supplement: 41598_2019_57053_MOESM1_ESM.pdf [file 41598_2019_57053_MOESM1_ESM.pdf]

## **Supplementary Information**

### **Aberrant expression of S-SCAM causes the loss of GABAergic synapses in hippocampal neurons**

Seung Min Shin, Samantha Skaar, Eric Danielson, and Sang H. Lee

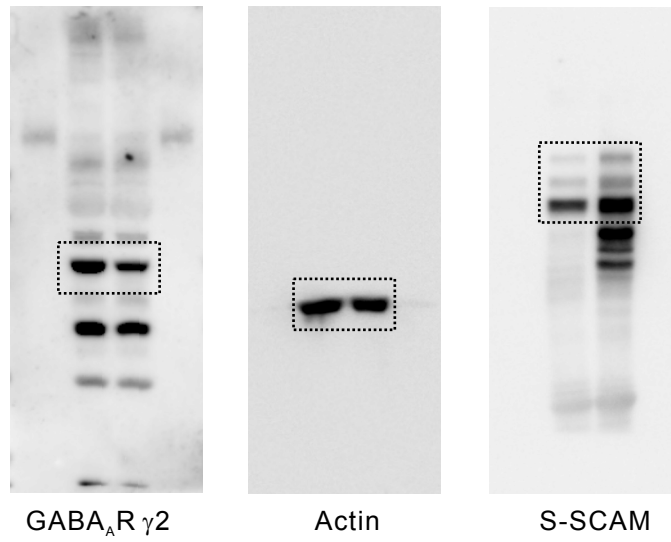

**Supplementary Figure 1.** Uncropped full size images of blots shown in Fig. 7c.
